# Supplementary material for: Unveiling Epigenetic Vulnerabilities in Triple-Negative Breast Cancer through 3D Organoid Drug Screening
Source: MDPI journal article supplement (doi:10.3390/ph17020225), 2024-02-08
Supplement: s1 [file s1]

Figure S2

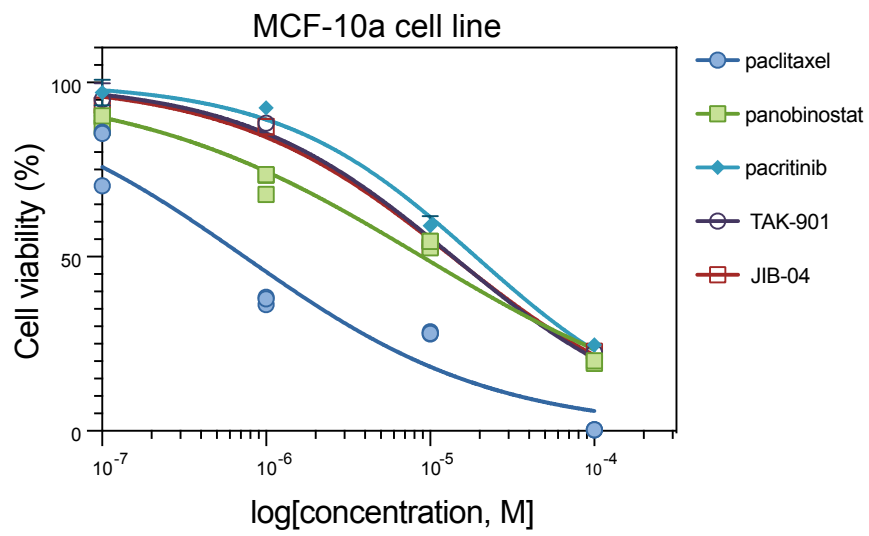

Figure S2. Dose-response curves for the non-tumorigenic epithelial MCF-10a cell line following treatment with paclitaxel, panobinostat, pacritinib, TAK-901, and JIB-04.
